# Supplementary material for: Dominant ACO2 mutations are a frequent cause of isolated optic atrophy
Source: PubMed Central journal article supplement (PMC8152918; doi:10.1093/braincomms/fcab063), 2021-04-07
Supplement: fcab063_supplementary_data.pdf [file fcab063_supplementary_data.pdf]

supplementary Table 1 FINAL

| Pat # | Age | Sex | Age at diagnosis | BCVA                    | Visual field                                    | Optic discs                                                    | Other symptoms                                                                                                                                                       | cDNA variant      | protein change         | Geno-type | Segregation                                                                                                        | rs #         | gnomAD frequency | Sift  |       |               | dbSNV                   | ACMG criteria | ACMG classification |
|-------|-----|-----|------------------|-------------------------|-------------------------------------------------|----------------------------------------------------------------|----------------------------------------------------------------------------------------------------------------------------------------------------------------------|-------------------|------------------------|-----------|--------------------------------------------------------------------------------------------------------------------|--------------|------------------|-------|-------|---------------|-------------------------|---------------|---------------------|
|       |     |     |                  |                         |                                                 |                                                                |                                                                                                                                                                      |                   |                        |           |                                                                                                                    |              |                  | PP2   | MT    | Score         |                         |               |                     |
| 1     | 25  | F   | unk.             | OD: 0.5;<br>OS: 0.63    | NA                                              | ODS: diffuse loss                                              | none                                                                                                                                                                 | c.172C>T          | p.(Arg58*)             | HT        | no DNA                                                                                                             | rs751460831  | 3,98E-06         |       |       | 1             | PVS1                    | 5             |                     |
| 2     | 4   | M   | since birth      | OD: 0.25;<br>OS: 0.2    | NA                                              | ODS: temporal atrophy                                          | none                                                                                                                                                                 | c.196_197del      | p.(Ser66Glyfs*10)      | HT        | grandfather affected; no DNA                                                                                       | unk.         |                  |       |       |               | PVS1                    | 5             |                     |
| 3     | 45  | M   | unk.             | OD: 0.7;<br>OS: 0.7     | paracentral scotoma                             | NA                                                             | none                                                                                                                                                                 | c.323T>C          | p.(Leu108Pro)          | HT        | no DNA                                                                                                             | unk.         |                  | 0     | 1     | 1             | PM2, PP2, PP3           | 3             |                     |
| 4     | 8   | M   | since birth      | OD: 0.4;<br>OS: 0.13    | OD: central scotoma, OS;<br>paracentral scotoma | ODS: temporal atrophy                                          | photophobia, manifest<br>nystagmus latent to<br>occlusion, OS esotropia                                                                                              | c.441C>G          | p.(Asn147Lys)          | HT        | father affected (+/-); mother<br>unaffected (+/+)                                                                  | unk.         |                  | 0,001 | 0,997 | 0,999         | PS3, PM2, PP2, PP3      | 4             |                     |
| 5     | 46  | F   | before 10 y      | OD: 0.5;<br>OS: 0.05    | large centrocecal scotoma                       | ODS: temporal atrophy, uncapped<br>papilla                     | left amblyopia                                                                                                                                                       | c.514A>C          | p.(Ile172Leu)          | HT        | no DNA                                                                                                             | unk.         | 4,08E-06         | 0,001 | 0,901 | 1             | PS3, PM2, PP2, PP3      | 4             |                     |
| 6     | 38  | M   | 32 y             | ODS: 0.1                | ODS: central scotoma                            | acute loss of vision                                           | head trauma at 10 y,<br>followed by epilepsy;<br>meningeal syndrome,<br>diabetes insipidus since<br>2015; diffuse algebra<br>syndrome; intolerance to the<br>effort. | c.718G>A          | p.(Gly240Ser)          | HT        | mother asymptomatic (+/-)                                                                                          | rs764138297  | 6,76E-05         | 0,001 | 0,993 | 1             | PS3, PM2, PP2, PP3      | 4             |                     |
| 7     | 50  | M   | unk.             | OD:<0.05;<br>OS: 0.9    | NA                                              | ODS: diffuse atrophy                                           | none                                                                                                                                                                 | c.740T>C          | p.(Val247Ala)          | HT        | no DNA                                                                                                             | rs750687436  | 3,98E-06         | 0     | 0,965 | 1             | PS3, PM2, PP2, PP3      | 4             |                     |
| 8     | 16  | M   | 11 y             | OD: 0.2;<br>OS: 0.4     | large annular central<br>scotoma                | ODS: temporal atrophy                                          | none                                                                                                                                                                 | c.741del          | p.(Ile248Serfs*2)      | HT        | affected sister and mother (+/-);<br>asymptomatic grandfather (+/+);<br>unaffected father and<br>grandmother (+/+) | unk.         |                  |       |       |               | PVS1                    | 5             |                     |
| 9     | 30  | M   | 13 y             | OD: 0.1;<br>OS: 0.5     | central scotoma                                 | ODS: diffuse atrophy                                           | macular dystrophy                                                                                                                                                    | c.935G>A          | p.(Lys312Gln)          | HT        | father asymptomatic (+/-);<br>mother unaffected (+/+)                                                              | rs1191153529 |                  | 0     | 1     | 1             | PM2, PP2, PP3           | 3             |                     |
| 10    | 21  | M   | 9 y              | OD: 0.2;<br>OS: 0.5     | central scotoma                                 | NA                                                             | none                                                                                                                                                                 | c.1032+1G>C       | p.?                    | HT        | no DNA                                                                                                             | unk.         |                  |       | 1     | 0,9999        | PVS1                    | 5             |                     |
| 11    | 30  | M   | 19 y             | ODS: 0.7                | centrocecal scotoma                             | ODS: temporal atrophy                                          | none                                                                                                                                                                 | c.1032+2T>C       | p.?                    | HT        | no DNA                                                                                                             | unk.         |                  |       | 1     | 0,9999        | PVS1                    | 5             |                     |
| 12    | 29  | M   | 25 y             | OD: 1; OS:<br>0.9       | central scotoma                                 | ODS: temporal atrophy                                          | none                                                                                                                                                                 | c.1032+5G>A       | p.?                    | HT        | father affected (+/-); mother<br>unaffected (+/+)                                                                  | unk.         |                  |       |       | 0,9999        | PM2                     | 3             |                     |
| 13    | 30  | F   | 3 y              | OD: 0.15;<br>OS: 0.25   | centrocecal scotoma                             | NA                                                             | none                                                                                                                                                                 | c.1132C>T         | p.(Arg378*)            | HT        | father asymptomatic (+/-);<br>mother unaffected (+/+)                                                              | unk.         |                  |       |       |               | PVS1                    | 5             |                     |
| 14    | 16  | M   | 13 y             | OD: 0.3;<br>OS: 0.2     | NA                                              | ODS: temporal atrophy                                          | microcysts in macula                                                                                                                                                 | c.1237C>T         | p.(Gln413*)            | HT        | no DNA                                                                                                             | unk.         |                  |       |       |               | PVS1                    | 5             |                     |
| 15    | 21  | F   | 9 y              | ODS: 0.2                | centrocecal scotoma                             | ODS: temporal and inferior<br>atrophy                          | none                                                                                                                                                                 | c.1254dup         | p.(Gly419fs*10)        | HT        | unaffected parents (+/+)                                                                                           | unk.         |                  |       |       |               | PVS1                    | 5             |                     |
| 16    | 58  | F   | 20 y             | OD: 0.63;<br>OS: 0.4    | centrocecal scotoma                             | ODS: normal RNFL; small papilla<br>poorly limited              | strong myopia since<br>childhood; cataract at 56 v                                                                                                                   | c.1291G>A         | p.(Gly431Ser)          | HT        | no DNA                                                                                                             | rs772704469  | 1,59E-05         | 0     | 0,994 | 1             | PS3, PM1, PM2, PP2, PP3 | 5             |                     |
| 17    | 33  | M   | 15 y             | OD: 0.2;<br>OS: 0.1     | central scotoma                                 | ODS: diffuse atrophy                                           | none                                                                                                                                                                 | c.1300C>T         | p.(Gln434*)            | HT        | brother unaffected (+/+)                                                                                           | rs1419587280 | 4,01E-06         |       |       |               | PVS1                    | 5             |                     |
| 18    | 50  | M   | 36 y             | OD: 0.32;<br>OS: 0.75   | centrocecal scotoma<br>OD>OS                    | ODS: temporal and inferior<br>atrophy                          | none                                                                                                                                                                 | c.1370+1G>A       | p.?                    | HT        | unaffected parents (+/+)                                                                                           | unk.         |                  |       | 1     | 0,9999        | PVS1                    | 5             |                     |
| 19    | 73  | M   | 50 y             | OD: 0.8;<br>OS: 1       | normal                                          | normal                                                         | cerebellar ataxia                                                                                                                                                    | c.1387G>C         | p.(Gly463Arg)          | HT        | no DNA                                                                                                             | rs2006715    | 2,12E-05         | 0,004 | 1     | 1             | PS3, PM2, PP2, PP3      | 4             |                     |
| 20    | 64  | F   | 42 y             | ODS: 0.1                | centrocecal scotoma                             | NA                                                             | none                                                                                                                                                                 | c.1420A>G         | p.(Arg474Gly)          | HT        | no DNA                                                                                                             | unk.         |                  | 0     | 1     | 1             | PM2, PP2, PP3           | 3             |                     |
| 21    | 36  | F   | 3 y              | OD: 0.1;<br>OS: 0.1     | central scotoma                                 | ODS: diffuse atrophy                                           | none                                                                                                                                                                 |                   |                        |           | mother and brother affected (+/-)                                                                                  |              |                  |       |       |               |                         |               |                     |
| 22    | 28  | F   | 3 y              | ODS: 0.1                | central scotoma                                 | ODS: diffuse atrophy; small optic<br>disc; inferior hypoplasia | none                                                                                                                                                                 | c.1425C>G         | p.(Asn475Lys)          | HT        | affected son (+/-)                                                                                                 | unk.         |                  | 0     | 1     | 1             | PM2, PP2, PP3           | 3             |                     |
| 23    | 28  | F   | 15 y             | ODS: 0.1                | central scotoma                                 | ODS: diffuse atrophy                                           | RPE dysomogeneity                                                                                                                                                    | c.1454A>G         | p.(Glu485Gly)          | HT        | no DNA                                                                                                             | unk.         | 0,455            | 0,001 | 0,999 | PM2, PP2, BP4 | 3                       |               |                     |
| 24    | 29  | F   | since birth      | OD: 0.032;<br>OS: LP    | OD: superonasal scotoma;<br>OS: NA              | ODS: temporal pallor; small disk                               | congenital nystagmus,<br>exotropia OS, migraine                                                                                                                      | c.1452_1459del    | p.(Glu485Cysfs*4<br>4) | HT        | father affected (+/-); mother and<br>3 brothers/sisters unaffected<br>(+/-)                                        | unk.         |                  |       |       |               | PVS1                    | 5             |                     |
| 25    | 20  | M   | 3 y              | OD: 0.1;<br>OS: 0.08    | central scotoma                                 | ODS: temporal atrophy                                          | microcysts in macula                                                                                                                                                 | c.1753_1759del    | p.(Leu585Argfs*7<br>3) | HT        | no DNA                                                                                                             | unk.         |                  |       |       |               | PVS1                    | 5             |                     |
| 26    | 16  | M   | before 10 y      | OD: 0.08;<br>OS: 0.1    | central scotoma                                 | ODS: diffuse atrophy                                           | none                                                                                                                                                                 | c.1753_1755delCTC | p.(Leu585del)          | HT        | father affected (+/-); mother<br>unaffected (+/+)                                                                  | unk.         |                  |       |       |               | PM2, PM4                | 3             |                     |
| 27    | 36  | M   | 6 y              | OD: 0.063;<br>OS: 0.063 | paracentral scotoma                             | ODS: diffuse atrophy                                           | none                                                                                                                                                                 | c.1761+1G>A       | p.?                    | HT        | mother affected (+/-); father<br>unaffected (+/+)                                                                  | unk.         |                  |       |       | 0,9999        | PVS1                    | 5             |                     |
| 28    | 41  | M   | before 10 y      | OD: 0.4;<br>OS: 0.3     | central scotoma                                 | NA                                                             | none                                                                                                                                                                 | c.1789A>T         | p.(Ile597Phe)          | HT        | no DNA                                                                                                             | unk.         |                  | 0     | 1     | 1             | PM2, PP2, PP3           | 3             |                     |
| 29    | 8   | M   | 4 y              | OD: 0.08;<br>OS: 0.15   | central scotoma                                 | ODS: superior and inferior atrophy                             | none                                                                                                                                                                 | c.1808G>C         | p.(Trp603Ser)          | HT        | no DNA                                                                                                             | unk.         |                  | 0     | 0,994 | 1             | PS3, PM2, PP2, PP3      | 4             |                     |
| 30    | 30  | M   | 3 y              | OD: 0.01;<br>OS: 0.14   | central scotoma                                 | ODS: temporal atrophy                                          | microcysts in macula;<br>Barlow disease, normal MRI                                                                                                                  |                   |                        |           |                                                                                                                    |              |                  |       |       |               |                         |               |                     |
| 31    | 38  | M   | unk.             | ODS: 0.8                | centrocecal scotoma                             | NA                                                             | none                                                                                                                                                                 | c.1820G>A         | p.(Arg607His)          | HT        | no DNA                                                                                                             | rs1213893717 | 3,99E-06         | 0     | 1     | 1             | PM2, PM5, PP2, PP3      | 4             |                     |
| 32    | 56  | F   | 54 y             | OD: CF;<br>OS: 1.0      | NA                                              | temporal gliosis                                               | metabolic syndrome                                                                                                                                                   | c.1898G>A         | p.(Arg633His)          | HT        | no DNA                                                                                                             | rs371183037  |                  | 0,017 | 0,004 | 0,999         | PS3, PM2, PP2, PP3      | 4             |                     |

|    |    |   |             |                       |                                              |                                           |                                                                                                                                                                    |                  |                    |    |                                                                                |             |          |       |       |       |        |                          |   |
|----|----|---|-------------|-----------------------|----------------------------------------------|-------------------------------------------|--------------------------------------------------------------------------------------------------------------------------------------------------------------------|------------------|--------------------|----|--------------------------------------------------------------------------------|-------------|----------|-------|-------|-------|--------|--------------------------|---|
| 33 | 9  | M | 8 y         | OD: 0.8;<br>OS: 1     | NA                                           | ODS: temporal atrophy                     | none                                                                                                                                                               | c.1949A>C        | p.(Tyr650Ser)      | HT | mother asymptomatic (+/-)                                                      | unk.        |          | 0     | 1     | 1     |        | PM2, PM3, PP3            | 3 |
| 34 | 56 | F | before 10 y | ODS: CF               | central scotoma                              | NA                                        | none                                                                                                                                                               | c.1987G>T        | p.(Glu663*)        | HT | no DNA                                                                         | unk.        |          |       |       |       |        | PVS1                     | 5 |
| 35 | 26 | F | 4 y         | OD: 0.1;<br>OS: 0.12  | ODS: centro + superior scotoma               | ODS: superior and inferior atrophy        | none                                                                                                                                                               | c.1995dup        | p.(Gly666Argfs*46) | HT | no DNA                                                                         | unk.        |          |       |       |       |        | PVS1                     | 5 |
| 36 | 33 | F | 6 y         | ODS: 0.08             | paracentral scotoma                          | NA                                        | none                                                                                                                                                               | c.1999G>A        | p.(Glu667Lys)      | HT | no DNA                                                                         | unk.        |          | 0     | 1     | 1     |        | PM2, PP2, PP3            | 3 |
| 37 | 36 | M | 16 y        | OD: 0.1;<br>OS: 0.3   | OS: central scotoma OD: NA                   | NA                                        | none                                                                                                                                                               | c.2006C>T        | p.(Ser669Leu)      | HT | no DNA                                                                         | rs764832926 | 4.02E-06 | 0     | 1     | 1     |        | PM2, PP2, PP3            | 3 |
| 38 | 44 | F | 35 y        | ODS: 0.32             | paracentral scotoma                          | ODS: temporal atrophy                     | hearing loss                                                                                                                                                       |                  |                    |    | father affected with hearing loss                                              |             |          |       |       |       |        |                          |   |
| 39 | 71 | M | 63 y        | OD: 0.5;<br>OS: 1     | centrocecal scotoma                          | ODS: superior and inferior atrophy        | hearing loss                                                                                                                                                       | c.2011C>T        | p.(Arg671Trp)      | HT | no DNA                                                                         | rs377518755 | 4.01E-06 | 0     | 1     | 1     |        | PS1, PS3, PM2, PP2, PP3  | 5 |
| 40 | 58 | F | 13 y        | OD: 0.2;<br>OS: 0.5   | central scotoma                              | ODS: temporal atrophy                     | hypothyroidism                                                                                                                                                     |                  |                    |    | no DNA                                                                         |             |          |       |       |       |        |                          |   |
| 41 | 22 | M | 2 y         | OS: 0.15;<br>OD: 0.1  | centrocecal scotoma                          | ODS: diffuse atrophy                      | none                                                                                                                                                               |                  |                    |    | mother and grandfather affected (+/-); father and grandmother unaffected (+/+) |             |          |       |       |       |        |                          |   |
| 42 | 32 | M | 7 y         | OD: 0.2;<br>OS: 0.16  | central scotoma                              | ODS: temporal atrophy                     | none                                                                                                                                                               | c.2012G>A        | p.(Arg671Gln)      | HT | mother affected (+/-); father unaffected (+/+)                                 | rs755024692 | 8.01E-06 | 0.002 | 1     | 1     |        | PS1, PS3, PM2, PP2, PP3  | 5 |
| 43 | 25 | M | 12 y        | OD: 0.4;<br>OS: 0.8   | small centrocecal scotoma                    | ODS: temporal atrophy                     | ptosis OS                                                                                                                                                          |                  |                    |    | no DNA                                                                         |             |          |       |       |       |        |                          |   |
| 44 | 61 | F | unk.        | OD: 0.32;<br>OS: 0.8  | central scotoma                              | OD: diffuse atrophy, OS: temporal atrophy | small and dysmorphic optic disk; cataract and glaucoma OD                                                                                                          |                  |                    |    | no DNA                                                                         |             |          |       |       |       |        |                          |   |
| 45 | 30 | M | before 10 y | OD: 0.12;<br>OS: 0.06 | centrocecal scotoma                          | NA                                        | macular dystrophy with reduced central multifocal ERG responses                                                                                                    | c.2035C>T        | p.(Arg679Cys)      | HT | no DNA                                                                         | rs747898560 | 4.01E-06 | 0     | 1     | 1     |        | PM2, PP2, PP3            | 3 |
| 46 | 41 | M | unk.        | OD: 0.05;<br>OS: 0.08 | central scotoma                              | NA                                        | none                                                                                                                                                               | c.2086+2T>C      | p.?                | HT | no DNA                                                                         | unk.        |          |       |       |       | 0.9999 | PVS1                     | 5 |
| 47 | 43 | M | 14 y        | OD: 0.17;<br>OS: 0.16 | paracentral scotoma                          | ODS: temporal atrophy                     | none                                                                                                                                                               | c.2107G>C        | p.(Gly703Arg)      | HT | mother affected (+/-); father unaffected (+/+)                                 | unk.        |          | 0     | 1     | 1     |        | PS3, PM2, PP2, PP3       | 4 |
| 48 | 5  | M | 5 y         | OD: CF;<br>OS: 0.05   | central scotoma                              | ODS: diffuse atrophy                      | none                                                                                                                                                               | c.2128G>C        | p.(Ala710Pro)      | HT | no DNA                                                                         | unk.        |          | 0.007 | 0.877 | 0.999 |        | PS3, PM2, PP2, PP3       | 4 |
| 49 | 40 | M | 7 y         | OD: 0.08;<br>OS: 0.12 | NA                                           | NA                                        | macula fanned bds; meningitis                                                                                                                                      | c.2293T>G        | p.(Trp765Gly)      | HT | no DNA                                                                         | unk.        |          | 0     | 1     | 1     |        | PM2, PP2, PP3            | 3 |
| 50 | 15 | F | unk.        | ODS: 0.03             | central scotoma                              | NA                                        | none                                                                                                                                                               | c.2311G>C        | p.(Ala771Pro)      | HT | no DNA                                                                         | unk.        |          | 0     | 1     | 1     |        | PM2, PP2, PP3            | 3 |
| 51 | 30 | M | 4 y         | ODS: <0.1             | central scotoma                              | ODS: diffuse atrophy                      | epilepsy at 22; memory disorder and fatigability; normal MRI                                                                                                       | c.36+5delG       | p.?                | HC | unaffected parents are HT for each variant                                     | unk.        |          |       |       |       | 0.9999 | PM2, PP3                 | 3 |
|    |    |   |             |                       |                                              |                                           |                                                                                                                                                                    | c.719G>C         | p.(Gly240Ala)      |    |                                                                                | rs141878785 | 0.000585 | 0.001 | 0.608 | 1     |        | PS3, PM2, PP2, PP3       | 4 |
| 52 | 59 | M | unk.        | ODS: 0.05             | centrocecal scotoma                          | ODS: temporal atrophy; uncapped papilla   | none                                                                                                                                                               | c.166C>T         | p.(Arg56Cys)       | HM | brother (-/-); sister (+/-)                                                    | rs746995807 | 0        | 0     | 1     | 1     |        | PS3, PM2, PP2, PP3       | 4 |
| 53 | 61 | M | 30 y        | ODS: 0.1              | NA                                           | NA                                        | kinetic and static cerebellar syndrome with cerebellar atrophy, episode of dysarthria at 45 y; migraine-related GCC, chronic diffuse pain and a cerebellar atrophy | c.220C>G         | p.(Leu74Val)       | HC | no DNA                                                                         | rs141772938 | 0.0037   | 0.001 | 0.554 | 0.999 |        | PP2, PP3, PP5            | 3 |
|    |    |   |             |                       |                                              |                                           |                                                                                                                                                                    | c.1390G>T        | p.(Glu464*)        |    |                                                                                | unk.        |          |       |       |       |        | PVS1                     | 5 |
| 54 | 45 | M | 27 y        | OD: CF;<br>OS: 1.2    | OD: large scotoma                            | NA                                        | none                                                                                                                                                               | c.610A>C         | p.(Ile204Leu)      | HC | no DNA                                                                         | rs774011999 | 3.19E-05 | 0.996 | 0.027 | 1     |        | PS3, PM2, PP2            | 4 |
|    |    |   |             |                       |                                              |                                           |                                                                                                                                                                    | c.1690C>T        | p.(Arg564Cys)      |    |                                                                                | rs781117483 | 7.96E-06 | 0     | 1     | 1     |        | PS3, PM2, PP2, PP3       | 4 |
| 55 | 19 | F | 16 y        | ODS: 0.05             | NA                                           | ODS: severe atrophy                       | strabismus in childhood; asymmetrical banal myopia                                                                                                                 | c.680C>A         | p.(Pro227His)      | HM | no DNA                                                                         | unk.        |          | 0     | 1     | 1     |        | PS3, PM2, PP2, PP3       | 4 |
| 56 | 53 | M | 2 y         | OD: 0.015;<br>OS: CF  | NA                                           | NA                                        | none                                                                                                                                                               | c.220C>G         | p.(Leu74Val)       | HC | no DNA                                                                         | rs141772938 | 0.0037   | 0.001 | 0.554 | 0.999 |        | PP2, PP3, PP5            | 3 |
|    |    |   |             |                       |                                              |                                           |                                                                                                                                                                    | c.1981G>A        | p.(Gly661Arg)      |    |                                                                                | rs752034900 | 4.00E-06 | 0     | 1     | 1     |        | PVS1, PM2, PP2, PP3, PP5 | 5 |
| 57 | 32 | F | before 10 y | ODS: 0.25             | central scotoma OD>OS                        | OS: diffuse atrophy; OD: temporal atrophy | intraretinal cysts                                                                                                                                                 | c.1064C>G        | p.(Pro355Arg)      | HC | parents are (+/-) and (-/-); unaffected sister (+/-)                           | unk.        |          | 0     | 1     | 1     |        | PM2, PP2, PP3            | 3 |
|    |    |   |             |                       |                                              |                                           |                                                                                                                                                                    | c.1879G>A        | p.(Gly627Ser)      |    |                                                                                | rs145042292 | 0.000368 | 0.022 | 0.06  | 1     |        | PM2, PP2, PP3            | 3 |
| 58 | 21 | M | 11 y        | OD: 0.8;<br>OS: 0.4   | OD: paracentral scotoma; OS: central scotoma | ODS: temporal and inferior atrophy        | moderate photophobia                                                                                                                                               | c.2282C>T        | p.(Thr761Met)      | HC | no DNA                                                                         | rs142767544 | 4.4E-05  | 0.095 | 0.166 | 1     |        | PM2, PP2, BP4            | 3 |
|    |    |   |             |                       |                                              |                                           |                                                                                                                                                                    | c.1406T>A        | p.(Val469Asp)      |    |                                                                                | unk.        |          | 0     | 1     | 1     |        | PS3, PM2, PP2, PP3       | 4 |
| 59 | 6  | M | since birth | OD: 0.5;<br>OS: 0.4   | NA                                           | ODS: temporal atrophy                     | none                                                                                                                                                               | c.220C>G         | p.(Leu74Val)       | HC | 2 affected brothers; no DNA                                                    | rs141772938 | 0.0037   | 0.001 | 0.554 | 0.999 |        | PP2, PP3, PP5            | 3 |
|    |    |   |             |                       |                                              |                                           |                                                                                                                                                                    | c.2212_2213delCT | p.(Leu738Glnfs*26) |    |                                                                                | unk.        |          |       |       |       |        | PVS1                     | 5 |
| 60 | 7  | M | 6 y         | OD: 0.25;<br>OS: 0.08 | central scotoma                              | ODS: temporal atrophy                     | none                                                                                                                                                               | c.220C>G         | p.(Leu74Val)       | HC | no DNA                                                                         | rs141772938 | 0.0037   | 0.001 | 0.554 | 0.999 |        | PP2, PP3, PP5            | 3 |
|    |    |   |             |                       |                                              |                                           |                                                                                                                                                                    | c.525+1G>A       | p.?                |    |                                                                                | unk.        |          |       |       |       | 0.9999 | PVS1                     | 5 |

|    |    |   |     |                   |    |    |                    |             |              |    |                         |             |        |       |       |       |               |      |
|----|----|---|-----|-------------------|----|----|--------------------|-------------|--------------|----|-------------------------|-------------|--------|-------|-------|-------|---------------|------|
| 61 | 36 | F | 3 y | OD: LP; OS:<br>HM | NA | NA | migraine; anorexia | c.220C>G    | p.(Leu74Val) | HC | unaffected mother (+/-) | rs141772938 | 0.0037 | 0.001 | 0.554 | 0.999 | PP2, PP3, PP5 | 3    |
|    |    |   |     |                   |    |    |                    | c.1297-1G>C | p.?          |    |                         | unk.        |        |       |       |       | 0,9999        | PVS1 |

**Supplementary Table 1: Clinical data of the 61 ACO2 individuals.**

Legend: OD: oculus dexter; OS: oculus sinister; y: years; BCVA: best corrected visual acuity; CF: count fingers; HM: hand movement; LP: light perception; HT: heterozygous; HM: homozygous; HC: heterozygous composite; unk.: unknown; NA: not analyzed; "-": presence of the mutated allele; "+": presence of the wild type allele. ACMG classification: 5: pathogenic; 4: likely pathogenic; 3: uncertain significance.

**supplementary Table 2 Final**

| Variant              | Local structure changes (YASARA viewer) |               |                |                |           | Molecular dynamic simulation (Gromacs) |                                |                        | Protein-ligands interaction (Autodock 4.2)          |                                                   |                                                     |                                                       | Comments                                                           |
|----------------------|-----------------------------------------|---------------|----------------|----------------|-----------|----------------------------------------|--------------------------------|------------------------|-----------------------------------------------------|---------------------------------------------------|-----------------------------------------------------|-------------------------------------------------------|--------------------------------------------------------------------|
|                      | HB losed (N°)                           | HI losed (N°) | HB gained (N°) | HI gained (N°) | Comments  | Protein Stability (RMSD)               | Amino acids Flexibility (RMSF) | Protein dimension (Rg) | Binding energy of [ACO2]-SF4 interaction (Kcal/mol) | Binding energy of [(ACO2-SF4)-citrate] (Kcal/mol) | Binding energy of [(ACO2-SF4)-aconitate] (Kcal/mol) | Binding energy of [(ACO2-SF4)-isocitrate]] (Kcal/mol) |                                                                    |
| <b>Native ACO2</b>   |                                         |               |                |                |           |                                        |                                |                        | -3,43                                               | -8,74                                             | -7,83                                               | -6,46                                                 |                                                                    |
| <b>p.(Ile172Leu)</b> | _                                       | 1             | _              | 2              | change    | no change                              | affected                       | no change              | -3,38                                               | -8,92                                             | -7,32                                               | -6,82                                                 | no change                                                          |
| <b>p.(Asn147Lys)</b> | 2                                       | _             | _              | 1              | change    | increased                              | affected                       | decreased              | -3,49                                               | -8,44                                             | -7,08                                               | -6,19                                                 | no change                                                          |
| <b>p.(Gly240Ser)</b> | _                                       | _             | _              | _              | no change | increased                              | affected                       | decreased              | -3,48                                               | -8,58                                             | -7,35                                               | -6,53                                                 | no change                                                          |
| <b>p.(Val247Ala)</b> | _                                       | 2             | _              | _              | change    | decrease                               | affected                       | no change              | -3,48                                               | -8,57                                             | -7,23                                               | -6,2                                                  | no change                                                          |
| <b>p.(Gly431Ser)</b> | _                                       | _             | _              | _              | no change | increased                              | affected                       | decreased              | -3,48                                               | -8,53                                             | -7,39                                               | -6,23                                                 | no change                                                          |
| <b>p.(Gly463Arg)</b> | _                                       | _             | _              | _              | change    | increased                              | affected                       | decreased              | -3,42                                               | -8,24                                             | -7,75                                               | -5,93                                                 | no change                                                          |
| <b>p.(Trp603Ser)</b> | _                                       | 5             | 1              | _              | change    | increased                              | affected                       | decreased              | -3,73                                               | -8,47                                             | -7,35                                               | -6,11                                                 | no change                                                          |
| <b>p.(Arg633His)</b> | 2                                       | _             | _              | 1              | change    | increased                              | affected                       | decreased              | -3,69                                               | -8,71                                             | -7,2                                                | -6,68                                                 | no change                                                          |
| <b>p.(Ser669Leu)</b> | 1                                       | _             | _              | _              | change    | increased                              | affected                       | decreased              | -3,81                                               | -4,7                                              | -3,95                                               | -3,24                                                 | binding energy increased and Isocitrate does not interact with SF4 |
| <b>p.(Arg671Gln)</b> | 4                                       | 1             | 1              | _              | change    | increased                              | affected                       | decreased              | -3,72                                               | -6,6                                              | -5,45                                               | -4,11                                                 | binding energy increased                                           |
| <b>p.(Arg671Trp)</b> | 4                                       | 1             | _              | 1              | change    | increased                              | affected                       | decreased              | -3,8                                                | -2,3                                              | -2,34                                               | -1,31                                                 | binding energy increased and all ligands do not interact with SF4  |

|               |   |   |   |   |        |           |          |           |       |       |       |       |                                            |
|---------------|---|---|---|---|--------|-----------|----------|-----------|-------|-------|-------|-------|--------------------------------------------|
| p.(Gly703Arg) | – | – | 2 |   | change | increased | affected | decreased | -3,61 | -8,72 | -8,04 | -6,68 | citrate does not interact with SF4 cluster |
| p.(Ala710Pro) | – | – | – | 1 | change | increased | affected | decreased | -3,69 | -8,27 | -7,36 | -6,7  | citrate does not interact with SF4 cluster |

|               |   |   |   |   |           |           |          |           |       |       |       |       |           |
|---------------|---|---|---|---|-----------|-----------|----------|-----------|-------|-------|-------|-------|-----------|
| p.(Arg56Cys)  | 2 | – | – | – | change    | no change | affected | no change | -3,44 | -8,69 | -7,58 | -6,04 | no change |
| p.(Leu74Val)  | 2 | – | – | 1 | change    | increased | affected | decreased | -3,47 | -8,63 | -6,96 | -6,85 | no change |
| p.(Ile204Leu) | – | 2 | – |   | change    | increased | affected | decreased | -3,46 | -8,86 | -7,87 | -6,34 | no change |
| p.(Pro227His) | 1 | – | – | 1 | change    | increased | affected | decreased | -3,47 | -8,78 | -7,74 | -6,73 | no change |
| p.(Gly240Ala) | – | – | – | – | no change | increased | affected | decreased | -3,46 | -8,44 | -7,7  | -5,64 | no change |
| p.(Val469Asp) | – | 2 | – | – | change    | increased | affected | decreased | -3,44 | -8,78 | -7,77 | -6,6  | no change |
| p.(Arg564Cys) | 3 | – | – | – | change    | increased | affected | decreased | -3,69 | -8,45 | -6,87 | -5,6  | no change |
| p.(Gly661Arg) | – | – | 1 | 3 | change    | increased | affected | decreased | -3,72 | -8,73 | -7,47 | -6,18 | no change |
| p.(Gly683Asp) | – | – | 2 | 2 | change    | increased | affected | decreased | -3,45 | -8,68 | -6,79 | -5,96 | no change |
| p.(Pro712Leu) | – | – | – | 1 | change    | increased | affected | decreased | -3,46 | -8,64 | -7,7  | -6,77 | no change |
| p.(Thr761Met) | – | – | – | – | no change | increased | affected | decreased | -3,73 | -8,51 | -7,73 | -6,78 | no change |

**Supplementary Table 2:** Impact of missense variants on ACO2 protein structure, using the YASARA viewer, Gromacs 5.1.4 and Autodock 4.2 softwares.

Dominant variants are in black; recessive variants are in red. HB: hydrogen bond, HI: hydrophobic interaction, \*: hydrogen bond.

Changes in ACO2 biophysical parameters were considered as fulfilling the PS3 criteria from the ACMG classification.

#### **METHODS: In silico analysis of the ACO2 missense mutations**

The FASTA sequence of ACO2 protein was retrieved from the UNIPROT database (Q99798) and the 3D structure of the native ACO2 protein was determined using the SWISS-MODEL servers (Waterhouse et al. 2018). The most suitable template to build the 3D model was selected on the basis of sequence identity and the QMEAN function.

The 3D mutant structures were generated using Pymol software, and the energy minimization for all 3D structures was done using the GROMACS 5.1.4

software. The 3D structure differences between the native and mutated ACO2 proteins were determined using the YASARA viewer software (Krieger et Vriend 2014).

The molecular dynamics simulations of the native and mutated ACO2 proteins were performed using the GROMACS 5.1.4 software package, with the force field CHARMM 27 (MacKerell et al., 1998). The production simulations were performed at 300K for 10 ns. Gmx rms, gmx rmsf and gmx gyrate commands were used to calculate the root-mean-square deviation (RMSD), the root-mean-square fluctuation (RMSF) and radius of gyration (Rg), respectively. All graphs were created using the QtGrace software.

AutoDock4.2 (ADT) was used for the molecular docking studies. The pdb files of the [4Fe,4S] cluster, citrate, cis-aconitate and isocitrate ligands were downloaded from the RCSB PDB protein data base (<https://www.rcsb.org/>), prepared using ADT and saved in PDBQT format. The native and mutated ACO2 structures were obtained using the SwissModel servers, prepared using ADT and saved in PDBQT format. The grid box size was set at 64, 54, and 62 Å for x, y, and z, respectively. The spacing between the grid points was 0.375 Å. The grid center was set at 38.067, 35.197 and 70.766 Å for x, y, and z, respectively. The Lamarckian Genetic Algorithm (LGA) was chosen to search for the best conformers, and all the docking processes were performed with the default parameters of AutoDock 4.2. All figures representing structures were produced using Ligplot+ with the default parameters.

supplemental references:

Krieger E and Vriend G.

YASARA View—molecular graphics for all devices—from smartphones to workstations. *Bioinformatics* 2014; 30 (20): 2981-82.

MacKerell AD, Bashford D, Bellott M, Dunbrack RL, Evanseck JD, Field MJ, et al.

All-atom empirical potential for molecular modeling and dynamics studies of proteins. *J Phys Chem B*. 1998 Apr 30;102(18):3586-616

Waterhouse A, Bertoni M, Bienert S, Studer G, Tauriello G, Gumienny R, et al.

SWISS-MODEL: homology modelling of protein structures and complexes.

*Nucleic Acids Res*. 2018 Jul 2;46(W1):W296-W303.

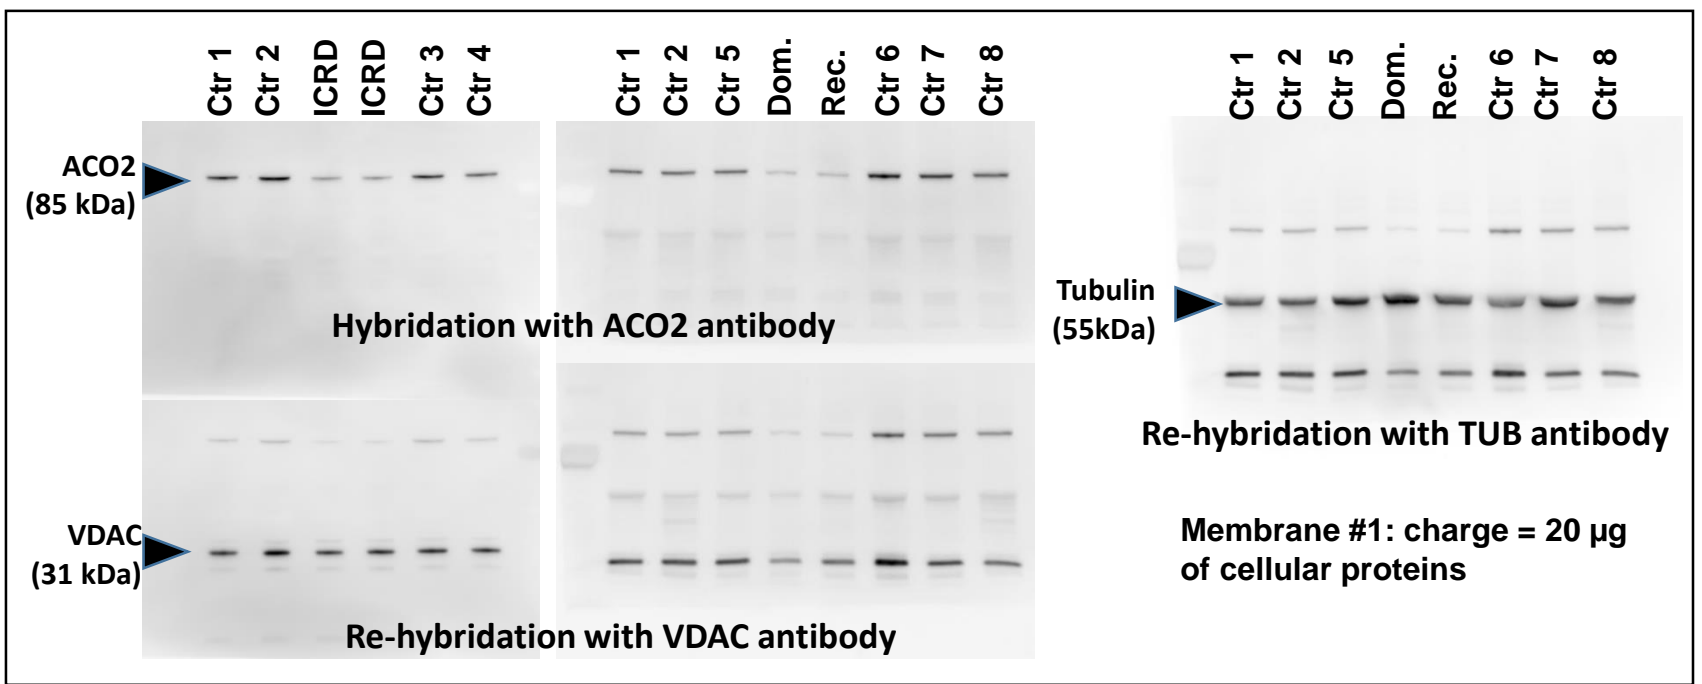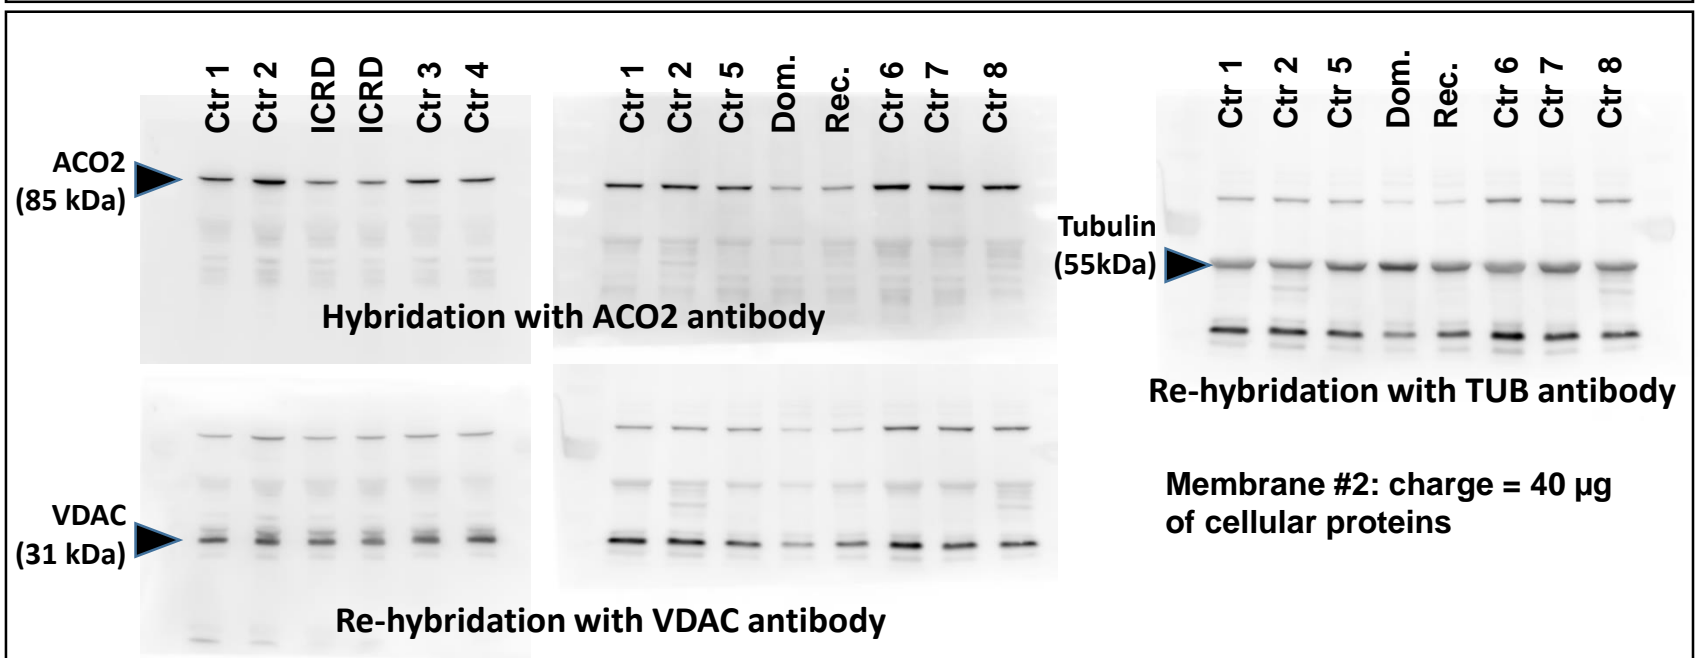

Assessment of ACO2 abundance in fibroblasts by Western Blot

Supplementary Figure 1

## **Appendix:**

The European ION Group is composed of the following collaborators:

- **Francesca Bisulli:** Unit of Neurology, Department of Biomedical and NeuroMotor Sciences (DIBINEM), University of Bologna, Bologna, Italy; IRCCS Institute of Neurological Sciences of Bologna, Bellaria Hospital, Bologna, Italy.
- **Catherine Vignal:** Neuroophthalmology Department, Rothschild Ophthalmologic Foundation, Paris, France
- **Sabine Defoort-Dhellemmes, Isabelle Drumare-Bouvet:** Exploration of Visual Function and Neuro-Ophthalmology Department, Lille University Hospital, Rue Emilie Laine, Lille Cedex, France.
- **Yaumara Perdomo Trujillo, Helene Dollfus:** Centre de référence pour les Affections Rares en Génétique Ophtalmologique, CHU de Strasbourg, Strasbourg, France.
- **Sylvie Odent:** Department of Clinical Genetics, CHU de Rennes, Rennes University, CNRS IGDR (institut de génétique et développement de Rennes), UMR6290, Rennes, France.
- **Carmen Ayuso:** Department of Genetics, Health Research Institute-Jiménez Díaz Foundation, University Hospital (IIS-FJD-UAM), Madrid, Spain.
- **Dan Milea:** Singapore Eye Research Institute, Singapore National Eye Centre and Duke-NUS, Singapore, Singapore.
- **Astrid Plomp:** Department of Clinical Genetics, Amsterdam University Medical Centre, AMC, Amsterdam, The Netherlands
- **Arturo Carta:** Medical and Surgery Department (DIMEC), University of Parma, Parma, Italy
- **Anna Maria De Negri:** Azienda Ospedaliera San Camillo-Forlanini, Rome, Italy
- **Costantino Schiavi:** Ophthalmology Unit, S.Orsola-Malpighi University Hospital, University of Bologna, Bologna, Italy
- **Maria Lucia Cascavilla:** Department of Ophthalmology, University Vita-Salute, IRCCS Ospedale San Raffaele, Milan, Italy
- **Piero Barboni:** Department of Ophthalmology, University Vita-Salute, IRCCS Ospedale San Raffaele, Milan, Italy; Studio Oculistico d'Azeglio, Bologna, Italy,
- **Klaus Rütger :** Augenarztpraxis, Dorotheenstraße, Berlin, Germany
- **Wolf A Lagrèze:** Eye Center, Medical Center, Faculty of Medicine, University of Freiburg, Freiburg, Germany.
